# Supplementary material for: Quantitative Analysis of Selected Microorganisms Present at Various Sites in a Prosthetics Clinic and Dental Laboratory during Complete Denture Fabrication
Source: MDPI journal article supplement (doi:10.3390/ijerph17103345), 2020-05-12
Supplement: s1 [file s1]

# Supplementary Materials: Quantitative Analysis of Selected Microorganisms Present at Various Sites in A Prosthetics Clinic and Dental Laboratory During Complete Denture Fabrication

## Questionnaire: Clinicians and students

Academic status:      Staff ☐      Postgraduate student ☐      Undergraduate student ☐

### Questions: Please circle your answer

- 1    Is infection control important while performing Prosthodontic treatment?      Yes      No      Don't know
- 2    Have you been vaccinated for Hepatitis B?      Yes      No      Don't know
- 3    Can Hepatitis B be transmitted through saliva?      Yes      No      Don't know
- 4    Can Tuberculosis be transmitted through saliva?      Yes      No      Don't know
- 5    Can HIV be transmitted through saliva?      Yes      No      Don't know
- 6    Do you wash your hands before and after patient examination?    Yes    No    Sometimes
- 7    If "yes" or "sometimes":  
      What do you wash your hands with? .....  
      .....
- 8    Do you use gloves during prosthodontic treatment?      Yes      No      Sometimes
- 9    Do you rinse impressions with water before sending to the lab?    Yes    No    Sometimes
- 10   Do you disinfect your impressions before sending to the lab?      Yes      No      Sometimes  
      If "yes" or "sometimes":  
      a.    What type of disinfectant is it? ..... OR: Don't know  
      b.    What is the trade name? ..... OR: Don't know  
      c.    What is its composition (chemical contents)?  
              ..... OR: Don't know
- 11   Do you just rinse the trial bases, dentures etc. with tap water?    Yes    No    Sometimes

- |    |                                                                                                  |     |     |            |
|----|--------------------------------------------------------------------------------------------------|-----|-----|------------|
| 12 | Is rinsing with tap water sufficient to remove contaminants?                                     | Yes | No  | Don't know |
| 13 | When you send a procedure to the laboratory, do you inform them if you have disinfected or not?  | Yes | No  | Sometimes  |
| 14 | Does the lab inform you if their work has been disinfected?                                      | Yes | No  | Sometimes  |
| 15 | Have you received training on how to disinfect at each stage of the denture fabrication process? |     | Yes | No         |
| 16 | Are you aware of the infection control procedures indicated in "The Pros Book"?                  |     | Yes | No         |
| 17 | Do you feel the infection control procedures you use are adequate?                               | Yes | No  | Don't Know |
| 18 | Are you aware of the infection control procedures used in the dental laboratory?                 |     | Yes | No         |
| 19 | Do you feel the laboratory infection control procedures are adequate?                            | Yes | No  | Don't know |
| 20 | Please feel free to add any other comment:                                                       |     |     |            |

## Questionnaire – Dental laboratory staff

**Questions: Please circle your answer**

- 1 Does the laboratory have an infection control (disinfection protocol) policy for work coming from the clinics? Yes No Don't know
- 2 Can infections be transmitted through dental procedures? Yes No Don't know
- 3 Is infection control important in dentistry? Yes No Don't know
- 4 Have you been vaccinated for Hepatitis B? Yes No Don't know
- 5 Can Hepatitis B be transmitted through saliva? Yes No Don't know
- 6 Can Tuberculosis (TB) be transmitted through saliva? Yes No Don't know
- 7 Can HIV be transmitted through saliva? Yes No Don't know
- 8 Is infection control important while performing dental laboratory procedures? Yes No Don't know
- 9 Do you wear gloves when working in the laboratory? Yes No Sometimes
- 10 Do you wear a mask when working in the laboratory? Yes No Sometimes  
If "Yes" or "sometimes", for what procedures? .....  
.....
- 11 Do you wear eye protection when working in the laboratory? Yes No Sometimes  
If "Yes" or "sometimes";, for what procedures? .....  
.....
- 12 Do you feel the need for your work surfaces to be disinfected? Yes No Don't know
- 13 Do you in fact disinfect your laboratory surfaces? Yes No Sometimes  
If "Yes" or "sometimes": give the name of disinfectant you use:  
..... OR: Don't know
- 14 Are you informed if the work received from the clinic has been disinfected? Yes No Sometimes
- 15 Do you disinfect work received from the clinic? Yes No Sometimes  
If Yes or "sometimes", how do you disinfect:

(a) Alginate impressions: .....

(b) Rubber- base impressions: .....

(c) Denture bases (Jaw reg, trial bases etc.): .....

16 Do you disinfect work you send back to the clinic? Yes No Sometimes

(a) If Yes or "sometimes", how:

.....

17 Do you disinfect rag wheels, burs, brushes before polishing? Yes No Sometimes

(a) If Yes or "sometimes", how:

.....

18 Do you feel the laboratory infection control procedures are adequate? Yes No Don't know

19 Do you inform the clinic if the work you send out has been disinfected? Yes No Sometimes

20 Do you use fresh pumice each time you polish a denture? Yes No Sometimes

21 Please feel free to add any other comment:

**Table 1.** Level of microbial contamination in the dental clinic during denture fabrication.

| Site                                                        | n  | Quantity<br>cfu/swab | Mixed<br>flora | % samples with organisms |              |                  |      |         |
|-------------------------------------------------------------|----|----------------------|----------------|--------------------------|--------------|------------------|------|---------|
|                                                             |    |                      |                | Streptococci             | Lactobacilli | <i>S. aureus</i> | AGNB | Candida |
| Primary<br>impression before<br>disinfection                | 10 | 0                    | 0              | 0                        | 60           | 60               | 20   | 70      |
|                                                             |    | 1-10                 | 0              | 10                       | 0            | 40               | 20   | 20      |
|                                                             |    | 11-100               | 20             | 20                       | 30           | 0                | 30   | 10      |
|                                                             |    | >100                 | 80             | 70                       | 10           | 0                | 30   | 0       |
| Primary cast from<br>lab                                    | 10 | 0                    | 0              | 30                       | 100          | 60               | 30   | 30      |
|                                                             |    | 1-10                 | 50             | 30                       | 0            | 30               | 60   | 60      |
|                                                             |    | 11-100               | 20             | 30                       | 0            | 10               | 10   | 10      |
|                                                             |    | >100                 | 30             | 10                       | 0            | 0                | 0    | 0       |
| Final impression<br>before disinfection                     | 10 | 0                    | 10             | 10                       | 80           | 80               | 90   | 80      |
|                                                             |    | 1-10                 | 40             | 40                       | 20           | 20               | 10   | 20      |
|                                                             |    | 11-100               | 20             | 20                       | 0            | 0                | 0    | 0       |
|                                                             |    | >100                 | 30             | 30                       | 0            | 0                | 0    | 0       |
| Final cast after jaw<br>registration                        | 10 | 0                    | 0              | 30                       | 100          | 90               | 80   | 80      |
|                                                             |    | 1-10                 | 50             | 30                       | 0            | 10               | 10   | 20      |
|                                                             |    | 11-100               | 0              | 20                       | 0            | 0                | 10   | 0       |
|                                                             |    | >100                 | 50             | 20                       | 0            | 0                | 0    | 0       |
| Bases for jaw<br>registration from<br>lab                   | 10 | 0                    | 50             | 60                       | 100          | 100              | 90   | 90      |
|                                                             |    | 1-10                 | 30             | 30                       | 0            | 0                | 0    | 0       |
|                                                             |    | 11-100               | 20             | 0                        | 0            | 0                | 0    | 0       |
|                                                             |    | >100                 | 0              | 10                       | 0            | 0                | 10   | 10      |
| Bases for jaw<br>registration clinic<br>before disinfection | 10 | 0                    | 0              | 0                        | 70           | 50               | 50   | 50      |
|                                                             |    | 1-10                 | 0              | 0                        | 20           | 30               | 10   | 40      |
|                                                             |    | 11-100               | 30             | 40                       | 10           | 20               | 20   | 10      |
|                                                             |    | >100                 | 70             | 60                       | 0            | 0                | 20   | 0       |
| Articulator from<br>lab                                     | 10 | 0                    | 10             | 30                       | 100          | 50               | 70   | 60      |
|                                                             |    | 1-10                 | 50             | 60                       | 0            | 40               | 30   | 40      |
|                                                             |    | 11-100               | 30             | 10                       | 0            | 10               | 0    | 0       |
|                                                             |    | >100                 | 10             | 0                        | 0            | 0                | 0    | 0       |
| Trial bases from<br>lab                                     | 10 | 0                    | 10             | 70                       | 100          | 70               | 70   | 70      |
|                                                             |    | 1-10                 | 60             | 10                       | 0            | 30               | 10   | 0       |
|                                                             |    | 11-100               | 10             | 10                       | 0            | 0                | 10   | 30      |
|                                                             |    | >100                 | 20             | 10                       | 0            | 0                | 10   | 0       |
| Final cast from lab                                         | 10 | 0                    | 10             | 30                       | 100          | 70               | 90   | 70      |
|                                                             |    | 1-10                 | 40             | 30                       | 0            | 30               | 10   | 20      |
|                                                             |    | 11-100               | 20             | 30                       | 0            | 0                | 0    | 10      |
|                                                             |    | >100                 | 30             | 10                       | 0            | 0                | 0    | 0       |
| Trial bases in clinic<br>before disinfection                | 10 | 0                    | 0              | 0                        | 80           | 50               | 80   | 50      |
|                                                             |    | 1-10                 | 10             | 10                       | 10           | 50               | 20   | 40      |
|                                                             |    | 11-100               | 40             | 40                       | 10           | 0                | 0    | 10      |
|                                                             |    | >100                 | 50             | 50                       | 0            | 0                | 0    | 0       |
| Final cast after try<br>in                                  | 10 | 0                    | 0              | 30                       | 100          | 80               | 80   | 50      |
|                                                             |    | 1-10                 | 50             | 40                       | 0            | 20               | 10   | 30      |
|                                                             |    | 11-100               | 20             | 20                       | 0            | 0                | 10   | 20      |
|                                                             |    | >100                 | 30             | 10                       | 0            | 0                | 0    | 0       |
| Articulator in<br>clinic after try in                       | 10 | 0                    | 30             | 40                       | 100          | 80               | 80   | 90      |
|                                                             |    | 1-10                 | 50             | 30                       | 0            | 20               | 10   | 10      |
|                                                             |    | 11-100               | 20             | 20                       | 0            | 0                | 10   | 0       |
|                                                             |    | >100                 | 0              | 10                       | 0            | 0                | 0    | 0       |

---

|                                                                    |    |        |     |     |     |    |    |    |
|--------------------------------------------------------------------|----|--------|-----|-----|-----|----|----|----|
| Final denture from lab                                             | 10 | 0      | 10  | 60  | 100 | 80 | 80 | 70 |
|                                                                    |    | 1-10   | 40  | 10  | 0   | 20 | 10 | 30 |
|                                                                    |    | 11-100 | 20  | 20  | 0   | 0  | 10 | 0  |
|                                                                    |    | >100   | 30  | 10  | 0   | 0  | 0  | 0  |
| Remount cast from lab                                              | 10 | 0      | 0   | 60  | 100 | 90 | 80 | 90 |
|                                                                    |    | 1-10   | 50  | 10  | 0   | 10 | 20 | 10 |
|                                                                    |    | 11-100 | 20  | 10  | 0   | 0  | 0  | 0  |
|                                                                    |    | >100   | 30  | 20  | 0   | 0  | 0  | 0  |
| Final denture before polishing with pumice and before disinfection | 10 | 0      | 0   | 0   | 70  | 70 | 70 | 40 |
|                                                                    |    | 1-10   | 0   | 0   | 10  | 30 | 0  | 50 |
|                                                                    |    | 11-100 | 0   | 0   | 10  | 0  | 0  | 0  |
|                                                                    |    | >100   | 100 | 100 | 10  | 0  | 30 | 10 |
| Remount cast clinic                                                | 10 | 0      | 10  | 20  | 100 | 90 | 90 | 80 |
|                                                                    |    | 1-10   | 50  | 40  | 0   | 10 | 10 | 10 |
|                                                                    |    | 11-100 | 0   | 20  | 0   | 0  | 0  | 10 |
|                                                                    |    | >100   | 40  | 20  | 0   | 0  | 0  | 0  |
| Final denture after polishing with pumice before disinfection      | 10 | 0      | 0   | 0   | 100 | 70 | 70 | 20 |
|                                                                    |    | 1-10   | 20  | 20  | 0   | 30 | 20 | 40 |
|                                                                    |    | 11-100 | 10  | 30  | 0   | 0  | 10 | 40 |
|                                                                    |    | >100   | 70  | 50  | 0   | 0  | 0  | 0  |

---

**Table S2.** Level of microbial contamination in the dental laboratory.

| Site                                  | n  | Quantity<br>cfu/swab | Mix<br>flora | % samples with organisms |              |                  |      |         |
|---------------------------------------|----|----------------------|--------------|--------------------------|--------------|------------------|------|---------|
|                                       |    |                      |              | Streptococci             | Lactobacilli | <i>S. aureus</i> | AGNB | Candida |
| Plaster room bench<br>for impressions | 10 | 0                    | 10           | 0                        | 90           | 90               | 50   | 100     |
|                                       |    | 1-10                 | 10           | 20                       | 0            | 10               | 30   | 0       |
|                                       |    | 11-100               | 50           | 70                       | 10           | 0                | 20   | 0       |
|                                       |    | >100                 | 30           | 10                       | 0            | 0                | 0    | 0       |
| Pumice area 1                         | 10 | 0                    | 0            | 0                        | 50           | 100              | 0    | 40      |
|                                       |    | 1-10                 | 0            | 0                        | 30           | 0                | 20   | 40      |
|                                       |    | 11-100               | 0            | 40                       | 20           | 0                | 20   | 20      |
|                                       |    | >100                 | 100          | 60                       | 0            | 0                | 60   | 0       |
| Pumice brush 1                        | 10 | 0                    | 0            | 10                       | 100          | 100              | 60   | 90      |
|                                       |    | 1-10                 | 10           | 20                       | 0            | 0                | 20   | 10      |
|                                       |    | 11-100               | 10           | 50                       | 0            | 0                | 20   | 0       |
|                                       |    | >100                 | 80           | 20                       | 0            | 0                | 0    | 0       |
| Pumice area 2                         | 10 | 0                    | 0            | 0                        | 80           | 100              | 20   | 70      |
|                                       |    | 1-10                 | 0            | 20                       | 10           | 0                | 20   | 20      |
|                                       |    | 11-100               | 0            | 20                       | 10           | 0                | 10   | 10      |
|                                       |    | >100                 | 100          | 60                       | 0            | 0                | 50   | 0       |
| Pumice brush 2                        | 10 | 0                    | 0            | 50                       | 100          | 100              | 80   | 100     |
|                                       |    | 1-10                 | 30           | 30                       | 0            | 0                | 10   | 0       |
|                                       |    | 11-100               | 30           | 10                       | 0            | 0                | 0    | 0       |
|                                       |    | >100                 | 40           | 10                       | 0            | 0                | 10   | 0       |
| Grinding wheel                        | 10 | 0                    | 50           | 70                       | 100          | 90               | 70   | 100     |
|                                       |    | 1-10                 | 20           | 30                       | 0            | 10               | 20   | 0       |
|                                       |    | 11-100               | 0            | 0                        | 0            | 0                | 10   | 0       |
|                                       |    | >100                 | 30           | 0                        | 0            | 0                | 0    | 0       |
| Clinical bench 1                      | 10 | 0                    | 0            | 30                       | 100          | 70               | 40   | 80      |
|                                       |    | 1-10                 | 40           | 20                       | 0            | 20               | 60   | 10      |
|                                       |    | 11-100               | 20           | 40                       | 0            | 10               | 0    | 10      |
|                                       |    | >100                 | 40           | 10                       | 0            | 0                | 0    | 0       |
| Clinical bench 2                      | 10 | 0                    | 0            | 0                        | 100          | 80               | 80   | 80      |
|                                       |    | 1-10                 | 20           | 70                       | 0            | 20               | 20   | 10      |
|                                       |    | 11-100               | 60           | 20                       | 0            | 0                | 0    | 10      |
|                                       |    | >100                 | 20           | 10                       | 0            | 0                | 0    | 0       |
| Clinical bench 3                      | 10 | 0                    | 0            | 10                       | 100          | 80               | 70   | 60      |
|                                       |    | 1-10                 | 30           | 60                       | 0            | 10               | 20   | 30      |
|                                       |    | 11-100               | 40           | 30                       | 0            | 10               | 10   | 10      |
|                                       |    | >100                 | 30           | 0                        | 0            | 0                | 0    | 0       |
| Clinical bench 4                      | 10 | 0                    | 0            | 30                       | 100          | 80               | 80   | 80      |
|                                       |    | 1-10                 | 40           | 50                       | 0            | 20               | 20   | 20      |
|                                       |    | 11-100               | 40           | 20                       | 0            | 0                | 0    | 0       |
|                                       |    | >100                 | 20           | 0                        | 0            | 0                | 0    | 0       |
| Clinical bench 5                      | 10 | 0                    | 10           | 30                       | 100          | 80               | 60   | 60      |
|                                       |    | 1-10                 | 20           | 50                       | 0            | 20               | 40   | 40      |
|                                       |    | 11-100               | 40           | 10                       | 0            | 0                | 0    | 0       |
|                                       |    | >100                 | 30           | 10                       | 0            | 0                | 0    | 0       |
